# Supplementary material for: RBP4 Is Associated With Insulin Resistance in Hyperuricemia-Induced Rats and Patients With Hyperuricemia
Source: PubMed Central journal article supplement (PMC8223863; doi:10.3389/fendo.2021.653819), 2021-06-10
Supplement: DataSheet_1.pdf [file DataSheet_1.pdf]

## Supplementary material

**Supplementary Table 1. The sequence of primers used for qPCR**

| <b>Genes</b> | <b>Sequences</b>                                                           |
|--------------|----------------------------------------------------------------------------|
| RBP4         | Forward: 5'-GGTGAGATGGAGTGGGTGTG-3'<br>Reverse: 5'-TGGCGCTCATATGACCCTTC-3' |
| GAPDH        | Forward: 5'-CTTTCCACCTTCGATGCCG-3'<br>Reverse: 5'-GGGTCTGGGATGGAAATTGT-3'  |
